# Supplementary material for: Salvia miltiorrhiza-Derived Sal-miR-58 Induces Autophagy and Attenuates Inflammation in Vascular Smooth Muscle Cells
Source: PubMed Central journal article supplement — Mol Ther Nucleic Acids. 2020 Jun 24;21:492–511. doi: 10.1016/j.omtn.2020.06.015 (PMC7360890; doi:10.1016/j.omtn.2020.06.015), 2020-06-24
Supplement: mmc1.pdf [file mmc1.pdf]

OMTN, Volume 21

## Supplemental Information

### ***Salvia miltiorrhiza*-Derived Sal-miR-58 Induces Autophagy and Attenuates Inflammation in Vascular Smooth Muscle Cells**

**Yan Qin, Bin Zheng, Gao-shan Yang, Hao-jie Yang, Jing Zhou, Zhan Yang, Xin-hua Zhang, Hong-ye Zhao, Jian-hong Shi, and Jin-kun Wen**

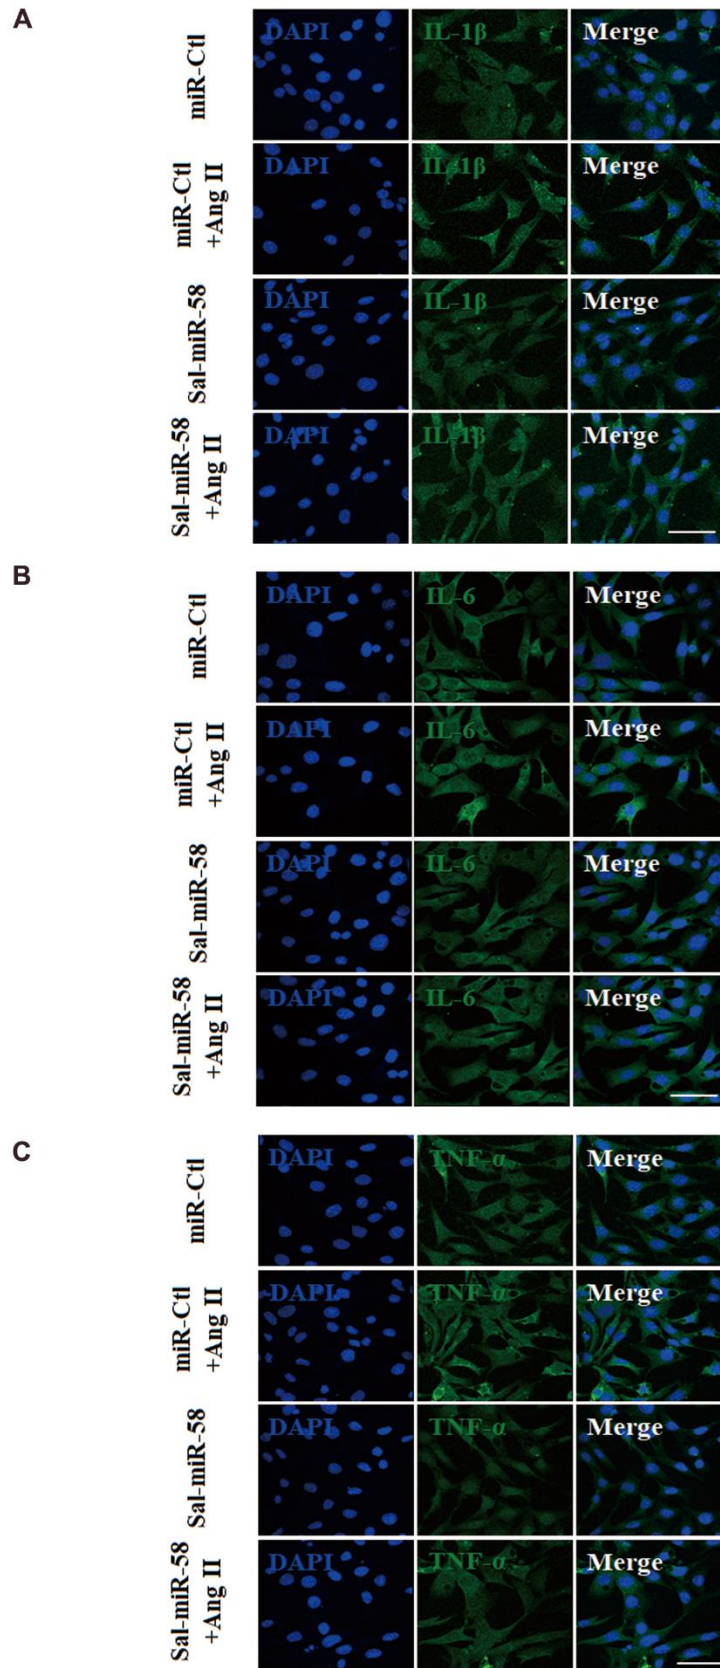

Supplementary Figure 1. Sal-miR-58 suppresses Ang II-stimulated inflammation

in VSMCs. (A to C) VSMCs were treated with Ang II or Sal-miR-58 alone or together, expression of IL-1 $\beta$ , IL-6 and TNF- $\alpha$  was examined by immunofluorescence staining. Green staining indicates IL-1 $\beta$ , IL-6 or TNF- $\alpha$  and blue staining indicates the nuclei, respectively. Scale bars =100  $\mu$ m.

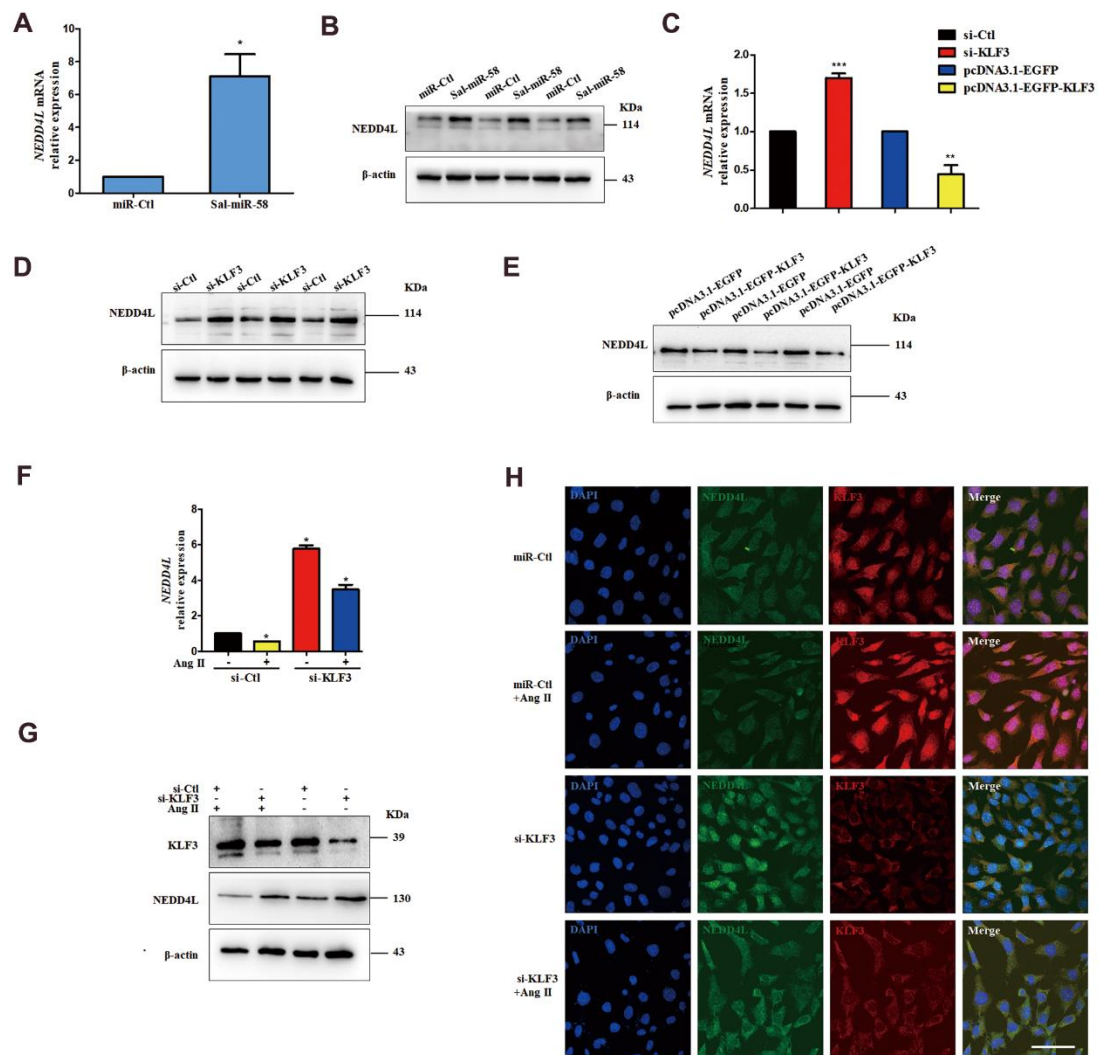

**Supplementary Figure 2. Sal-miR-58 induces VSMC autophagy by KLF3-mediated downregulation of NEDD4L.** (A) NEDD4L mRNA was determined by qRT-PCR in VSMCs transfected with Sal-miR-58. n=3; \* $P$ <0.05 vs. miR-Ctl. (B) Western blot analysis of NEDD4L in VSMCs transfected with Sal-miR-58 or miR-Ctl. (C) NEDD4L mRNA were determined by qRT-PCR in VSMCs transfected with si-

KLF3 or pcDNA3.1-KLF3.  $**P<0.01$  and  $***P<0.001$  vs. their corresponding control. (D) Western blot analysis of NEDD4L in VSMCs transfected with si-KLF3 or si-Ctl. (E) Western blot analysis of NEDD4L in VSMCs transfected with pcDNA3.1-KLF3 or pcDNA3.1. (F) VSMCs were transfected with si-Ctl (100 nM) or si-KLF3 (100 nM) and treated with/without Ang II, and the total RNA was harvested and analyzed by qRT-PCR.  $*P<0.05$ , vs. miR-Ctl. (G) VSMCs were transfected with si-KLF3 (100 nM) and treated with/without Ang II and the protein was harvested and analyzed by Western blotting using anti-KLF3 or anti-NEDD4L antibodies. (H) VSMCs were treated as in (G), and expression of KLF3 and NEDD4L was examined by immunofluorescence staining. Green, red and blue staining indicates NEDD4L, KLF3 and the nuclei, respectively. Scale bar=100  $\mu\text{m}$ .

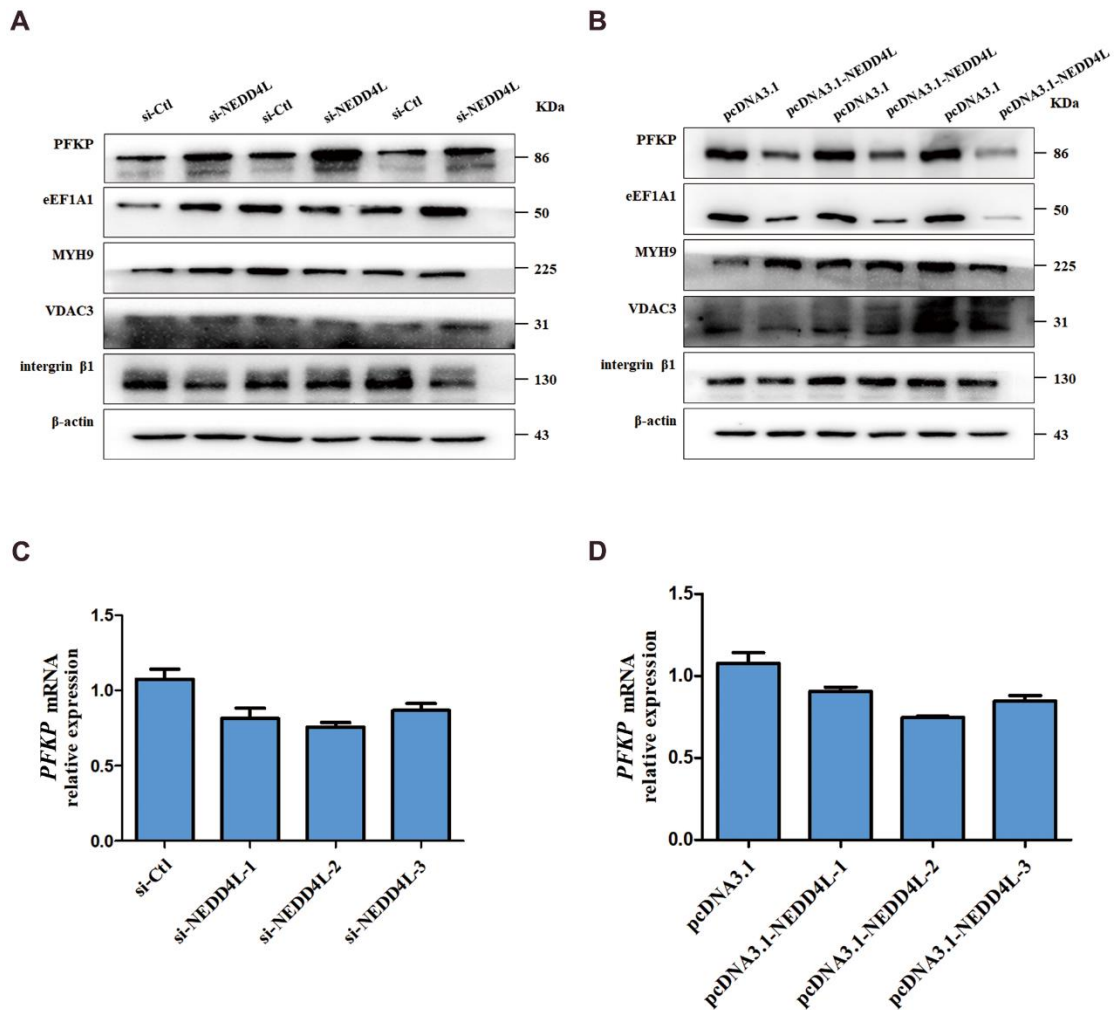

Supplementary Figure 3. NEDD4L knockdown or overexpression increases and

decreases, respectively, the level of PFKP protein. (A, B) Western blot analysis detected the expression of PFKP, eEF1A1, MYH9, VDAC3, integrin  $\beta$ 1 in VSMCs transfected with si-NEDD4L or pcDNA3.1-NEDD4L. (C, D) VSMCs were transfected with si-NEDD4L, pcDNA3.1-NEDD4L or their corresponding control, and relative expression of PFKP mRNA was examined by qRT-PCR and presented after normalizing to 18S rRNA (mean $\pm$ SEM; n=3).

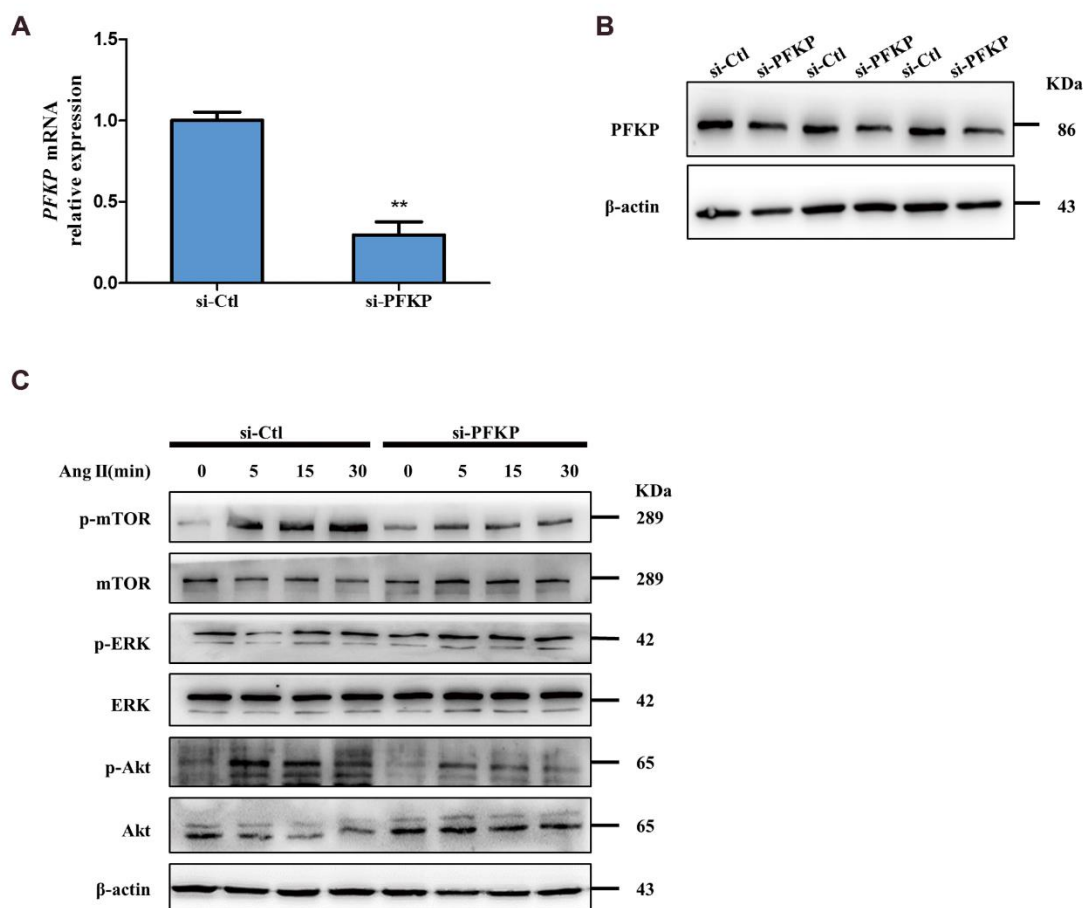

**Supplementary Figure 4. PFKP mediates Sal-miR-58-induced autophagy.** (A, B) VSMCs were transfected with si-PFKP for 24 h, and expression of PFKP was examined by qRT-PCR and Western blotting.  $**P < 0.01$  vs. si-Ctl, n=3. (C) VSMCs were transfected with si-PFKP or si-Ctl and treated with Ang II for different times. Western blot analysis detected total and phosphorylated mTOR, ERK1/2 and Akt.

**Table 1. Primers for Real-time PCR and RT-PCR**

| name             | Sequences 5' to 3'         |
|------------------|----------------------------|
| ppt-miR-414 F    | CAGTGCTGTCATCCTCATCATC     |
| ppt-miR-414 R    | TATGGTTGTTACGACTCCTTCAC    |
| hbr-miR-156 F    | GCAGTGC GTT GACAGAAGATAGA  |
| hbr-miR-156 R    | TATGGTTGTTACGACTCCTTCAC    |
| gra-miR-172-5p F | TCAGTCTGGTAGCATCATCAAG     |
| gra-miR-172-5p R | TATGGTTGTTACGACTCCTTCAC    |
| Sal-miR-58 F     | AAGGGGAUGUAGCUCAUC         |
| Sal-miR-58 R     | UGAGCUACAUCCCCUUUU         |
| U6 F             | CGCTTCGGCAGCACATATAC       |
| U6 R             | TTCACGAATTTGCGTGCATC       |
| IL-1 $\beta$ F   | CAACCAACAAGTGATATTCTCCATG  |
| IL-1 $\beta$ R   | GATCCACACTCTCCAGCTGCA      |
| IL-6 F           | ACTTCCATCCAGTTGCCTTCTTGG   |
| IL-6 R           | TTAAGCCTCCGACTTGTGAAGTGG   |
| TNF- $\alpha$ F  | CATCTTCTCAA AATTCGAGTGACAA |
| TNF- $\alpha$ R  | TGGGAGTAGACAAGGTACAACCC    |
| KLF3 F           | AGGCCTCACTCACGGGATAC       |
| KLF3 R           | AGAGAGGAAGGAGAACCGCC       |
| KLF4 F           | CAGTGGTAAGGTTTCTCGCC       |
| KLF4 R           | AAGCCAAAGAGGGGAAGAAG       |
| KLF5 F           | CACCGGATCTAGACATGCC        |
| KLF5 R           | ACGTCTGTGGAACAGCAGAG       |
| Beclin1 F        | GGACCAGGAGGAAGCTCAGTACC    |
| Beclin1 R        | GCTGTGCCAGATGTGGAAGGTG     |
| Atg5 F           | CAGAAGCTGTTCCGGCCTGTG      |
| Atg5 R           | CAGATGCTCGCTCAGCCACTG      |
| LC3B F           | TCGCCGACCGCTGTAAGGAG       |
| LC3B R           | CGCCGGATGATCTTGACCAACTC    |

|          |                            |
|----------|----------------------------|
| NEDD4L F | CAGTGGAGATTTGTGAACAGGG     |
| NEDD4L R | CTAGAATCCACCCCTTCAAATCCTTG |
| PFKP F   | CTCAGAGCCACCAGAGGACCTTC    |
| PFKP R   | CAGTCGGCACCGCAAGTCAAG      |

**Table 2. Primer sequences for ChIP**

| name                             | Sequences 5' to 3'    |
|----------------------------------|-----------------------|
| Klf3-Nedd41-bindingsite1-F       | GGCTTTGTTGTTGTTTCACGG |
| Klf3-Nedd41-bindingsite1-R       | TGTTTCGCCCCACGCCACC   |
| Klf3-Nedd41-bindingsite2-F       | GCCCCAGCTCAGTGCTCTGTG |
| Klf3-Nedd41-bindingsite2-R       | TGGTGTTCGCCCCACGC     |
| Klf3-Nedd41-negative primers 1-F | AGGTGCCCATCAACATA     |
| Klf3-Nedd41-negative primers 1-R | ATAAGAAGACCAGGTAACGA  |
| Klf3-Nedd41-negative primers 2-F | GCTGGTGCAACATCCTTC    |
| Klf3-Nedd41-negative primers 2-R | TTGAGTGCGGTGGTAAATTA  |

**Table 3. The siRNA sequences**

|              |                             |
|--------------|-----------------------------|
| si-KLF3 #1 F | CCCGUCGAAUUACAGAATT         |
| si-KLF3 #1 R | UCA UUG ACG UCU GUG GAA CTT |
| si-NEDD4L F  | GCAGAAAUACGACUACUUUTT       |
| si-NEDD4L R  | AAAGUAGUCGUUUUCUGCTT        |
| si-Control F | UUC UCC GAA CGU GUC ACG UTT |
| si-Control R | ACG UGA CAC GUU CGG AGA ATT |
| si-PFKP F    | CCUGUAACUUGGCGCGCUUTT       |
| si-PFKP R    | AAGCGCGCCAAGUUACAGGTT       |
